# Supplementary material for: Genetic structure is stronger across human-impacted habitats than among islands in the coral Porites lobata
Source: PeerJ journal article supplement (doi:10.7717/peerj.8550), 2020-02-18

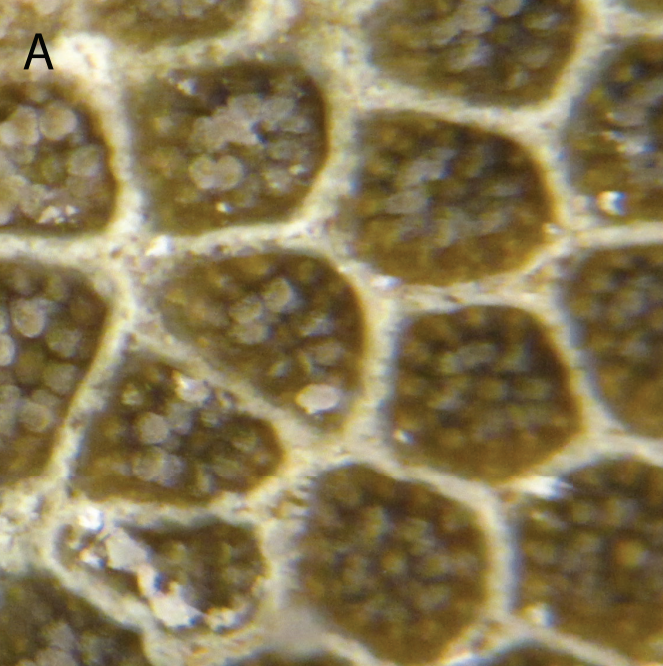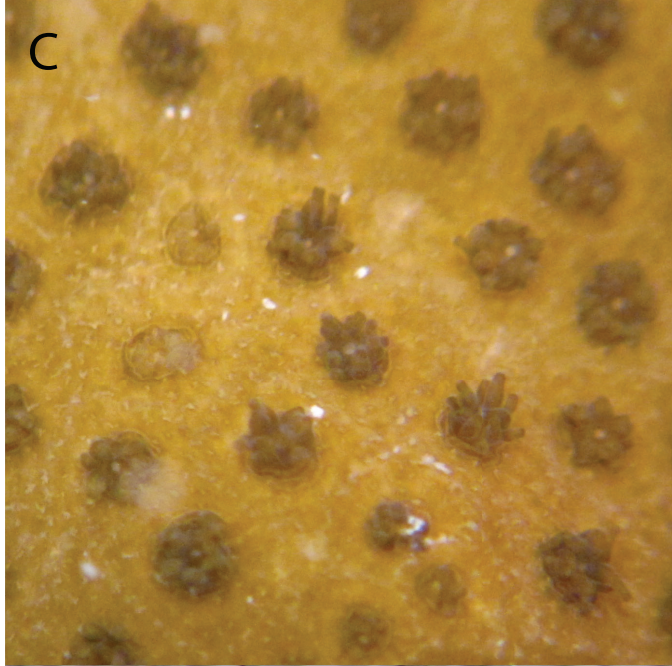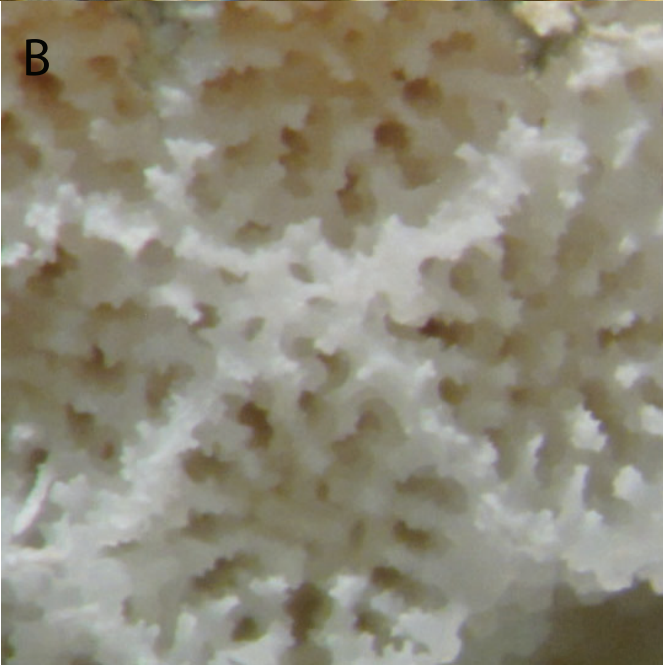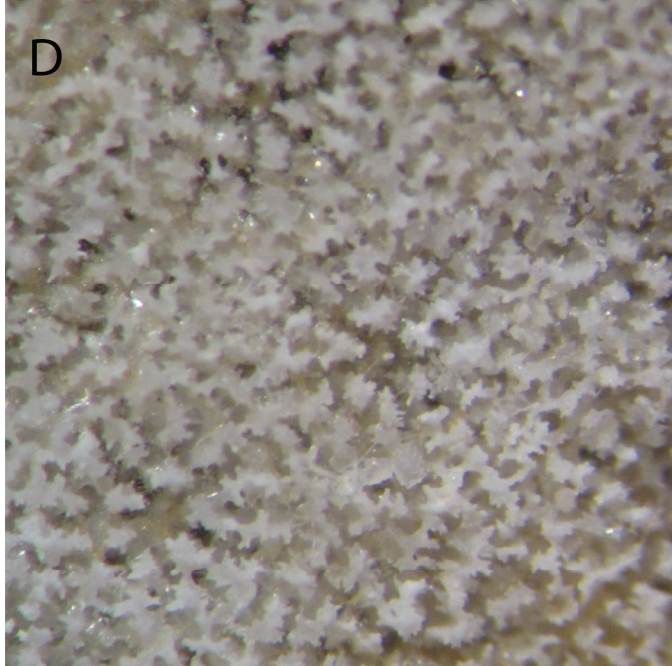

Supplement: Supplemental_Figure_3.pdf [file Supplemental_Figure_3.pdf]
